# Supplementary material for: The Step Test Evaluation of Performance on Stairs (STEPS): Validation and reliability in a neurological disorder
Source: PLoS One. 2019 Mar 21;14(3):e0213698. doi: 10.1371/journal.pone.0213698 (PMC6428278; doi:10.1371/journal.pone.0213698)
Supplement: S1 Dataset — (XLSX) [file pone.0213698.s002.xlsx]

## Sheet: STEPS_Data_All
ID	Age	UHDRS-Total Motor Score	Total Functional Capacity	Verbal.Fluency	Symbol Digits Modalities Test	Stroop Color	Stroop Word	Stroop Interference	Time since diagnosis in years	UHDRS ocular pursuit horizontal	UHDRS ocular pursuit vertical	UHDRS saccade initiation horizontal	UHDRS saccade initiation vertical	UHDRS saccade velocity horizontal	UHDRS saccade velocity vertical	UHDRS dysarthria	UHDRS tongue protrusion	UHDRS finger tap right	UHDRS finger tap left	UHDRS pronation/ supination right	UHDRS pronation/ supination left	UHDRS Luria	UHDRS rigidity arm right	UHDRS rigidity arm left	UHDRS bradykinesia	UHDRS dysarthria total	UHDRS chorea total	UHDRS Gait	UHDRS Tandem walking	UHDRS retropulsion test
1	44	60	4	6	5	39	54	10	12.5	1	1	2	2	2	2	1	2	2	2	2	2	4	2	2	1	10	16	2	2	0
2	63	36	8	40	33	43	53	21	9	1	1	1	1	1	1	0	1	1	1	1	1	1	1	1	0	2	17	1	2	0
3	46	34	5	6	10	22	43	10	19	1	1	2	2	1	1	0	1	2	2	3	3	4	0	0	1	2	7	1	0	0
4	31	28	10	25	39	36	32	22	NA	1	1	1	1	1	1	1	1	1	1	1	1	1	1	1	2	3	7	1	0	0
5	60	16	13	36	48	63	73	44	0.1	1	1	0	0	0	0	0	1	0	0	1	1	3	1	1	0	2	3	0	1	0
6	38	4	10	20	27	33	41	18	0.2	0	0	0	0	0	0	0	0	0	0	0	0	3	0	0	1	0	0	NA	NA	NA
7	36	6	13	47	60	77	95	43	0.5	1	1	0	0	0	0	0	1	0	0	0	0	3	0	0	0	0	0	0	0	0
8	59	39	13	37	28	52	90	24	0	0	0	2	1	1	1	0	1	1	1	1	1	3	1	1	0	7	12	1	4	0
9	60	53	5	24	8	30	36	10	NA	2	2	3	3	2	2	0	3	2	2	2	2	3	1	1	1	6	10	2	3	1
10	37	8	13	37	50	78	80	35	2	1	1	0	0	0	0	0	1	0	0	0	0	1	0	0	0	0	4	0	0	0
11	51	66	6	20	12	50	50	21	10	2	2	3	3	2	2	2	2	3	3	2	2	3	2	2	1	11	16	1	2	0
12	39	14	8	25	15	33	54	20	3.5	0	0	0	0	0	0	0	2	1	1	1	1	3	0	0	0	2	3	0	0	0
13	52	40	7	17	10	29	60	12	13	1	1	2	3	2	2	1	1	2	2	3	3	4	1	1	0	2	7	0	2	0
14	64	37	10	39	34	49	58	30	4	1	1	3	3	1	1	0	2	1	1	1	1	3	0	0	0	2	13	1	2	0
15	61	23	6	28	42	63	71	14	12.5	1	1	2	1	1	1	0	0	1	1	1	1	1	1	1	0	2	5	1	1	0
16	46	44	5	29	22	37	44	17	5.5	2	2	2	2	2	2	1	2	2	3	2	3	3	0	0	0	4	10	1	1	0
17	49	46	5	16	20	27	38	20	NA	2	2	3	2	2	2	0	2	2	2	2	2	3	1	1	1	5	7	1	3	1
18	62	23	12	17	34	57	53	20	7	1	1	3	2	1	1	0	0	0	1	1	1	3	1	1	0	2	4	0	0	0
19	74	21	11	22	26	54	57	16	1	0	0	2	2	0	0	0	0	0	1	0	0	3	1	0	0	0	8	0	2	2
20	50	42	7	17	19	36	64	18	1.5	1	1	1	2	1	1	0	2	1	2	1	2	3	1	1	0	4	15	1	1	1
21	48	22	12	52	35	50	97	23	9	1	1	2	2	1	1	0	1	0	0	1	1	1	0	0	0	2	8	1	0	0
22	23	52	4	11	22	35	43	23	3.5	2	2	3	3	2	2	1	1	2	2	2	2	3	1	1	1	6	14	1	1	0
23	52	26	9	24	38	54	53	41	0	1	1	1	1	1	1	0	0	0	1	0	1	3	1	1	1	1	10	1	0	0
24	42	48	9	12	22	40	51	20	3	1	1	2	1	2	2	0	1	2	2	2	2	3	1	1	1	5	16	1	2	0
25	21	0	13	31	63	96	73	36	0	0	0	0	0	0	0	0	0	0	0	0	0	0	0	0	0	0	0	0	0	0
26	55	56	6	14	14	49	44	24	4.5	2	2	3	3	2	2	1	2	2	3	3	3	3	1	1	0	2	20	1	2	1
27	34	3	13	45	48	68	87	30	1	0	0	0	0	0	0	0	0	0	0	0	0	1	0	0	0	2	0	0	0	0
28	59	64	9	23	30	42	35	6	14	1	1	3	3	2	2	1	2	3	3	2	2	4	2	2	2	8	16	1	3	1
29	62	30	7	40	35	89	56	31	2	1	1	1	1	1	1	0	0	1	1	1	1	1	1	1	0	2	12	1	2	0
30	38	33	6	29	32	53	71	31	NA	0	0	3	2	1	1	0	1	1	1	0	1	3	1	1	1	6	7	1	2	0
31	37	53	6	25	30	52	83	29	8	2	2	3	3	2	2	1	1	1	2	2	2	3	1	1	1	9	12	1	2	0
32	65	51	2	8	5	33	37	11	8	1	1	2	3	1	1	0	1	2	2	3	3	4	1	1	2	2	17	1	2	1
33	66	36	12	refused	refused	refused	refused	NA	1	0	1	2	1	1	1	1	1	0	1	0	0	1	1	1	0	5	15	1	2	1
34	53	30	7	23	37	51	64	24	2	0	0	2	2	1	1	0	2	0	1	0	0	3	0	0	0	2	13	1	2	0
35	69	37	9	14	24	57	47	14	NA	1	1	3	3	2	2	0	1	1	2	1	1	1	2	1	2	2	7	1	2	1
36	39	43	7	29	25	53	63	33	21	1	0	2	2	2	2	0	2	2	2	2	2	1	1	1	0	7	11	1	2	0
37	70	42	5	27	21	53	40	23	NA	1	1	2	1	1	1	0	1	2	2	2	2	1	1	1	1	3	14	1	3	2
38	69	34	7	40	26	41	59	23	1	0	0	0	0	0	0	0	1	1	1	2	2	1	1	1	1	4	14	1	2	2
39	60	31	11	21		41	67	17	6	1	1	1	1	1	1	1	1	1	1	1	1	1	0	1	0	5	10	1	1	0
40	30	30	8	16	30	78	46	27	0	0	0	2	2	1	1	0	2	1	1	0	0	3	1	1	1	2	9	1	2	0
