# Supplementary material for: The Step Test Evaluation of Performance on Stairs (STEPS): Validation and reliability in a neurological disorder
Source: PLoS One. 2019 Mar 21;14(3):e0213698. doi: 10.1371/journal.pone.0213698 (PMC6428278; doi:10.1371/journal.pone.0213698)
Supplement: S2 Dataset — (XLSX) [file pone.0213698.s003.xlsx]

## Sheet: STEPS_Data_All
ID	UHDRS- Total Motor Score	Stair Self-Efficacy Test score	Tinetti Mobility Test Total score	Single Leg Stance right (sec)	Single Leg Stance left (sec)	Timed Up and Go (sec)	10 meter walk test velocity (m/s)	STEPS total score (Administering rater)
1	60	64	21	0.52	1.26	14.39	0.86	14
2	36	45	24	6.28	5.15	11.255	1.41	16
3	34	39	23	1.67	3.775	10.16	1.33	20
4	28	65	26	6.495	3.22	9.385	1.45	20
5	16	73	26	12.37	60	8.69	1.45	16
6	4	10	18	3.92	4.34	15.27	0.82	11
7	6	67	28	60	60	7.17	1.91	20
8	39	32	14	1.23	1.54	11.44	1.22	7
9	53	24	13	1.86	4.73	25.02	0.39	4
10	8	84	28	30	30	9.19	1.68	20
11	66	42	18	6.62	0	9.57	1.78	13
12	14	90	28	7.45	6.79	10.78	1.16	19
13	40	71	26	9.08	11.24	8.64	1.35	16
14	37	39	20	1.5	3.36	13.45	1.46	17
15	23	48	21	3.33	3.1	11.03	1.55	17
16	44	52	20	0	2.05	9.29	1.88	16
17	46	58	17	7.08	8.59	10.93	1.42	14
18	23	78	25	8	6	9	1.94	19
19	21	82	26	12.1	4.7	6.5	1.7	20
20	42	22	22	4.5	1.3	6.8	1.67	15
21	22	90	28	29	23.5	9.1	1.68	20
22	52	42	17	2	1	10.8	1.38	11
23	26	90	26	14	20	6.07	1.92	20
24	48	54	22	3.375	3.255	11.2	1.8	20
25	0	90	28	30	30	7.9	1.72	20
26	56	29	20	2.74	1.99	15.38	0.99	10
27	3	83	28	30	30	8.73	1.7	20
28	64	48	11	1.3	0	12.2	1.38	12
29	30	37	19	2.45	3.25	9.45	1.53	16
30	33	19	17	3.15	2.1	12.7	1.24	19
31	53	75	18	2.57	1.525	7.405	1.76	14
32	51	18	14	5.5	3.5	14.89	0.95	10
33	36	37	19	3.7	1	12.2	1.27	14
34	30	68	22	3.95	3.3	9.7	1.5	15
35	37	31	15	1	1	12.2	1.57	15
36	43	58	16	2.02	1.65	12.6	0.77	12
37	42	40	16	0.98	0.845	11.82	1.45	10
38	34	76	20	1.73	2.19	10.25	1.46	13
39	31	90	22	4.75	15.9	6.15	2.04	19
40	30	52	23	2.25	4.85	10.7	1.21	15
