# Supplementary material for: The Step Test Evaluation of Performance on Stairs (STEPS): Validation and reliability in a neurological disorder
Source: PLoS One. 2019 Mar 21;14(3):e0213698. doi: 10.1371/journal.pone.0213698 (PMC6428278; doi:10.1371/journal.pone.0213698)
Supplement: S3 Dataset — (XLSX) [file pone.0213698.s004.xlsx]

## Sheet: STEPS_Data_All
ID	Age	Verbal Fluency	Symbol Digits Modalities Test	Stroop Color	Stroop Word	Stroop Interference	Stair Self-Efficacy Test	Ascend time	Descend time	STEPS test total (Administering rater)	UHDRS ocular pursuit horizontal	UHDRS ocular pursuit vertical	UHDRS saccade initiation horizontal	UHDRS saccade initiation vertical	UHDRS saccade velocity horizontal	UHDRS sacade velocity vertical	UHDRS dysarthria	UHDRS tongue protrusion	UHDRS finger tap right	UHDRS finger tap left	UHDRS pronation/ supination right	UHDRS pronation/ supination left	UHDRS Luria	UHDRS rigidity arm right	UHDRS rigidity arm left	UHDRS bradykinesia	UHDRS dysarthria total	UHDRS chorea total	UHDRS Gait	UHDRS Tandem walking	UHDRS retropulsion test
1	44	6	5	39	54	10	64	7.37	7.49	14	1	1	2	2	2	2	1	2	2	2	2	2	4	2	2	1	10	16	2	2	0
2	63	40	33	43	53	21	45	9.9	7.55	16	1	1	1	1	1	1	0	1	1	1	1	1	1	1	1	0	2	17	1	2	0
3	46	6	10	22	43	10	39	8.08	6.53	20	1	1	2	2	1	1	0	1	2	2	3	3	4	0	0	1	2	7	1	0	0
4	31	25	39	36	32	22	65	6.23	5.23	20	1	1	1	1	1	1	1	1	1	1	1	1	1	1	1	2	3	7	1	0	0
5	60	36	48	63	73	44	73	5.22	4.95	16	1	1	0	0	0	0	0	1	0	0	1	1	3	1	1	0	2	3	0	1	0
6	38	20	27	33	41	18	10	35.27	16.24	11	0	0	0	0	0	0	0	0	0	0	0	0	3	0	0	1	0	0	NA	NA	NA
7	36	47	60	77	95	43	67	5.22	5.4	20	1	1	0	0	0	0	0	1	0	0	0	0	3	0	0	0	0	0	0	0	0
8	59	37	28	52	90	24	32	11.79	15.04	7	0	0	2	1	1	1	0	1	1	1	1	1	3	1	1	0	7	12	1	4	0
9	60	24	8	30	36	10	24	27.79	44.92	4	2	2	3	3	2	2	0	3	2	2	2	2	3	1	1	1	6	10	2	3	1
10	37	37	50	78	80	35	84	4.71	3.95	20	1	1	0	0	0	0	0	1	0	0	0	0	1	0	0	0	0	4	0	0	0
11	51	20	12	50	50	21	42	5.9	8.78	13	2	2	3	3	2	2	2	2	3	3	2	2	3	2	2	1	11	16	1	2	0
12	39	25	15	33	54	20	90	6.56	5.73	19	0	0	0	0	0	0	0	2	1	1	1	1	3	0	0	0	2	3	0	0	0
13	52	17	10	29	60	12	71	6.7	8.57	16	1	1	2	3	2	2	1	1	2	2	3	3	4	1	1	0	2	7	0	2	0
14	64	39	34	49	58	30	39	7.45	8.26	17	1	1	3	3	1	1	0	2	1	1	1	1	3	0	0	0	2	13	1	2	0
15	61	28	42	63	71	14	48	6.42	6.08	17	1	1	2	1	1	1	0	0	1	1	1	1	1	1	1	0	2	5	1	1	0
16	46	29	22	37	44	17	52	6.53	6.43	16	2	2	2	2	2	2	1	2	2	3	2	3	3	0	0	0	4	10	1	1	0
17	49	16	20	27	38	20	58	6.85	8.48	14	2	2	3	2	2	2	0	2	2	2	2	2	3	1	1	1	5	7	1	3	1
18	62	17	34	57	53	20	78	6.96	5.53	19	1	1	3	2	1	1	0	0	0	1	1	1	3	1	1	0	2	4	0	0	0
19	74	22	26	54	57	16	82	6.77	4.83	20	0	0	2	2	0	0	0	0	0	1	0	0	3	1	0	0	0	8	0	2	2
20	50	17	19	36	64	18	22	5.43	7.37	15	1	1	1	2	1	1	0	2	1	2	1	2	3	1	1	0	4	15	1	1	1
21	48	52	35	50	97	23	90	5.78	5.9	20	1	1	2	2	1	1	0	1	0	0	1	1	1	0	0	0	2	8	1	0	0
22	23	11	22	35	43	23	42	12.64	8.85	11	2	2	3	3	2	2	1	1	2	2	2	2	3	1	1	1	6	14	1	1	0
23	52	24	38	54	53	41	90	5.8	4.71	20	1	1	1	1	1	1	0	0	0	1	0	1	3	1	1	1	1	10	1	0	0
24	42	12	22	40	51	20	54	6.05	6.73	20	1	1	2	1	2	2	0	1	2	2	2	2	3	1	1	1	5	16	1	2	0
25	21	31	63	96	73	36	90	6.1	5.4	20	0	0	0	0	0	0	0	0	0	0	0	0	0	0	0	0	0	0	0	0	0
26	55	14	14	49	44	24	29	9.22	14.79	10	2	2	3	3	2	2	1	2	2	3	3	3	3	1	1	0	2	20	1	2	1
27	34	45	48	68	87	30	83	5.26	5.47	20	0	0	0	0	0	0	0	0	0	0	0	0	1	0	0	0	2	0	0	0	0
28	59	23	30	42	35	6	48	6.62	9.97	12	1	1	3	3	2	2	1	2	3	3	2	2	4	2	2	2	8	16	1	3	1
29	62	40	35	89	56	31	37	11	13.89	16	1	1	1	1	1	1	0	0	1	1	1	1	1	1	1	0	2	12	1	2	0
30	38	29	32	53	71	31	19	6.22	5.83	19	0	0	3	2	1	1	0	1	1	1	0	1	3	1	1	1	6	7	1	2	0
31	37	25	30	52	83	29	75	7.62	7.77	14	2	2	3	3	2	2	1	1	1	2	2	2	3	1	1	1	9	12	1	2	0
32	65	8	5	33	37	11	18	9.93	22.21	10	1	1	2	3	1	1	0	1	2	2	3	3	4	1	1	2	2	17	1	2	1
33	66	refused	refused	refused	refused	NA	37	7.62	7.162	14	0	1	2	1	1	1	1	1	0	1	0	0	1	1	1	0	5	15	1	2	1
34	53	23	37	51	64	24	68	6.72	6.18	15	0	0	2	2	1	1	0	2	0	1	0	0	3	0	0	0	2	13	1	2	0
35	69	14	24	57	47	14	31	7.65	8.23	15	1	1	3	3	2	2	0	1	1	2	1	1	1	2	1	2	2	7	1	2	1
36	39	29	25	53	63	33	58	7.08	7.02	12	1	0	2	2	2	2	0	2	2	2	2	2	1	1	1	0	7	11	1	2	0
37	70	27	21	53	40	23	40	8.65	15.58	10	1	1	2	1	1	1	0	1	2	2	2	2	1	1	1	1	3	14	1	3	2
38	69	40	26	41	59	23	76	9.88	9.97	13	0	0	0	0	0	0	0	1	1	1	2	2	1	1	1	1	4	14	1	2	2
39	60	21		41	67	17	90	4.01	4.15	19	1	1	1	1	1	1	1	1	1	1	1	1	1	0	1	0	5	10	1	1	0
40	30	16	30	78	46	27	52	9.89	15.34	15	0	0	2	2	1	1	0	2	1	1	0	0	3	1	1	1	2	9	1	2	0
