# Supplementary material for: The Step Test Evaluation of Performance on Stairs (STEPS): Validation and reliability in a neurological disorder
Source: PLoS One. 2019 Mar 21;14(3):e0213698. doi: 10.1371/journal.pone.0213698 (PMC6428278; doi:10.1371/journal.pone.0213698)
Supplement: S4 Dataset — (XLSX) [file pone.0213698.s005.xlsx]

## Sheet: STEPS_Data_All
ID	TMSTotal	STEPS Test total score (administering rater)
1	21	14
2	24	16
3	23	20
4	26	20
5	26	16
6	18	11
7	28	20
8	14	7
9	13	4
10	28	20
11	18	13
12	28	19
13	26	16
14	20	17
15	21	17
16	20	16
17	17	14
18	25	19
19	26	20
20	22	15
21	28	20
22	17	11
23	26	20
24	22	20
25	28	20
26	20	10
27	28	20
28	11	12
29	19	16
30	17	19
31	18	14
32	14	10
33	19	14
34	22	15
35	15	15
36	16	12
37	16	10
38	20	13
39	22	19
40	23	15
