# Supplementary material for: The Step Test Evaluation of Performance on Stairs (STEPS): Validation and reliability in a neurological disorder
Source: PLoS One. 2019 Mar 21;14(3):e0213698. doi: 10.1371/journal.pone.0213698 (PMC6428278; doi:10.1371/journal.pone.0213698)
Supplement: S5 Dataset — (XLSX) [file pone.0213698.s006.xlsx]

## Sheet: STEPS_Data_All
ID	UHDRS- Total Motor score	STEPS test total score (Administering rater)
1	60	14
2	36	16
3	34	20
4	28	20
5	16	16
6	4	11
7	6	20
8	39	7
9	53	4
10	8	20
11	66	13
12	14	19
13	40	16
14	37	17
15	23	17
16	44	16
17	46	14
18	23	19
19	21	20
20	42	15
21	22	20
22	52	11
23	26	20
24	48	20
25	0	20
26	56	10
27	3	20
28	64	12
29	30	16
30	33	19
31	53	14
32	51	10
33	36	14
34	30	15
35	37	15
36	43	12
37	42	10
38	34	13
39	31	19
40	30	15
